# Supplementary material
Source: publisher figshare collection journal article supplement (https://karger.figshare.com/ndownloader/files/13628657)

**A**

underlying condition in  
relation to overall QoL

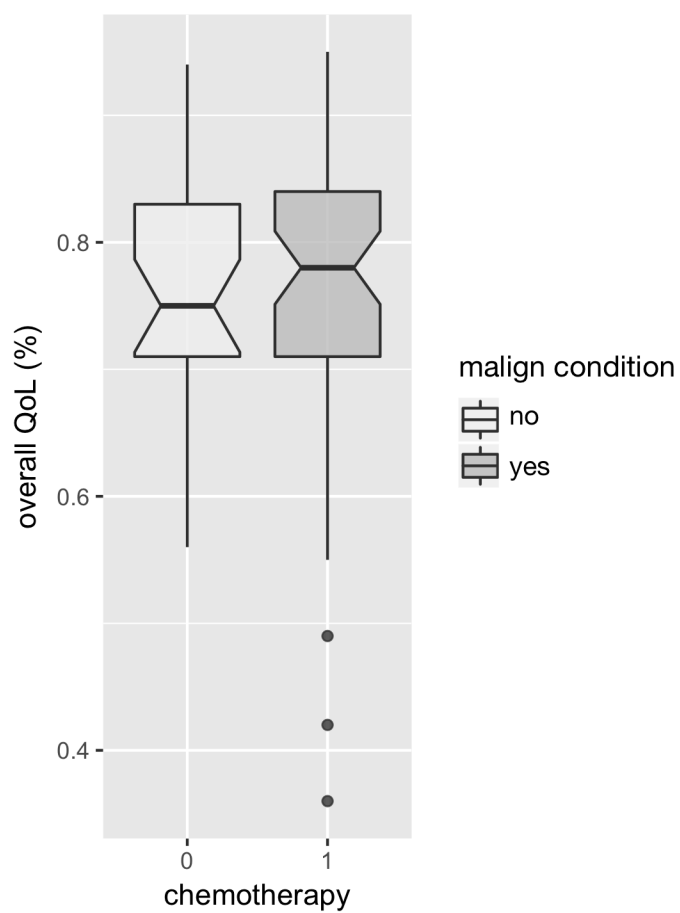**B**

chemotherapy in  
relation to overall QoL

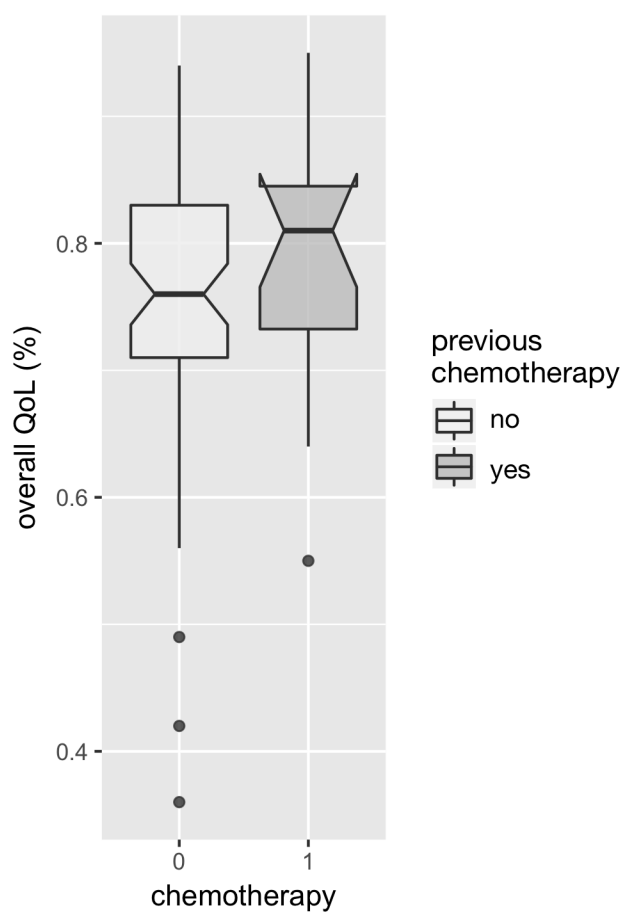

Supplement: Supplementary file 1 [file 13628657]
